# Supplementary material for: Phenylene-functionalized polythiophene derivatives for light-emitting diodes: their synthesis, characterization and propertiesElectronic supplementary information (ESI) available: experimental details for the preparation of compounds 2, 3a–c and 4a–c. See http://www.rsc.org/suppdata/jm/b1/b103717j/
Source: Royal Society of Chemistry journal article supplement (doi:10.1039/b103717j), 2001-10-31
Supplement: b103717j.doc [file b103717j.doc]

**B103717J *Electronic Supplementary Information***

Phenylene-functionalized polythiophene derivatives for light-emitting diodes: their synthesis, characterization and properties

# **Ai-Lin Ding, Jian Pei*, Yee-Hing Lai and Wei Huang***

*Institute of Materials Research and Engineering, National University of Singapore, 3 Research Link, Department of Chemistry, National University of Singapore, Singapore 117602, Republic of Singapore. E-mail: j-pei@imre.org.sg*

### Materials

THF used in the monomer preparation was dried by refluxing with metal sodium powder and benzophenone ketyl. Chloroform was dried by refluxing over calcium hydride. All commercial chemicals were all obtained from Aldrich Chemicals and used without further purification.

**3-(4-*n*-Butylphenyl)thiophene (2).**

After the solution of 4-*n*-butylphenylmagnesium bromide (0.132 mol) in dry THF was prepared, the Grignard reagent was slowly added dropwise to a mixture of 3-bromothiophene (0.12 mol) and dichlorobis(triphenylphosphine)nickel(II) (0.8% mol) in 200 mL of dry THF under ice-water bath. The mixture was stirred for 48 hours at room temperature. The mixture was quenched with pouring into saturated aqueous NH4Cl solution and then extracted by hexane. After it was washed with water and brine, the extracts was dried over MgSO4. Removal of the solvent followed the recrystallization from ethanol produced a white platelet crystal (yield, 71.6%). 1H NMR (CDCl3, 300 MHz, ppm, ): 7.51 (2H, d, *J* = 8.01 Hz, Ar-H), 7.50 (1H, dd, *J* = 1.86 Hz, *J* = 2.01Hz, Th-H), 7.38 (2H, d, *J* = 1.65 Hz, Th-H), 7.21 (2H, d, *J* = 8.01 Hz, Ar-H), 2.64 (2H, t, *J* = 4.3 Hz, CH2), 1.63 (2H, m, CH2), 1.36 (2H, m, CH2), 0.95 (3H, t, *J* = 5.6 Hz, CH3). Anal. Calcd for C14H16S: C, 77.76; H, 7.46; S, 14.78. Found: C, 77.88; H, 7.58; S, 14.49.

**1,4-Bis[4-(4’-*n*-butylphenyl)-2-thienyl]-2,5-didecyloxybenzene (3a).**

A solution of *n*-butyllithium (0.03 mol) in hexane was added slowly to a solution of diisopropylamine (0.031 mol) in 15 mL of dry THF at 0 oC. After it was stirred for 0.5 hour, the mixture was cooled to -78 C. A solution of 3-(4-*n*-butylphenyl)thiophene(**2)** (0.025 mol) in 20 mL of dry THF was added under nitrogen atmosphere. The mixture was stirred for 2 hours at –78 C and transferred to a solution of anhydrous zinc chloride (0.03 mol) in 20 mL of dry THF. The mixture was stirred at –78 C for 2 hours and then warmed up to room temperature. The mixture was transferred to a solution of 1,4-dibromo-2,5-didecyloxybenzene(**1a)** (0.01 mol) and tetrakis(triphenylphosphine)palladium (50 mg) in 20 mL of dry THF. After the mixture was stirred at room temperature for 12 hours and then refluxed for 12 hours, the mixture was quenched with pouring into aqueous saturated NH4Cl solution. The aqueous layer was extracted with hexane. The extracts were washed with water and brine and then dried over magnesium sulfate. Removal of solvent followed the recrystallization from chloroform-hexane resulted yellow needle crystal. EI-MS (m/e): 818 (100%). 1H NMR (CDCl3, 300 MHz, ppm, ): 7.81 (2H, d, *J* = 1.53 Hz, Th-H), 7.56 (4H, d, *J* = 8.17 Hz, Ar-H), 7.40 (2H, d, *J* = 1.41 Hz, Th-H), 7.29 (2H, s, Ar-H), 7.23 (4H, d, *J* = 8.15 Hz, Ar-H), 4.12 (4H, t, *J* = 6.51 Hz, OCH2), 2.65 (4H, t, *J* = 7.66 Hz, CH2), 1.92 (4H, m, CH2), 1.64-1.57 (8H, m, CH2), 1.42-1.27 (28H, m, CH2), 0.95 (6H, t, *J* = 7.34 Hz, CH3), 0.88 (6H, t, *J* = 6.41 Hz, CH3). 13C NMR (CDCl3, 75.5 MHz, ppm, ): 149.4, 141.8, 139.8, 133.5, 128.7, 126.1, 124.5, 120.1, 117.4, 112.6, 69.7, 35.2, 33.5, 31.8, 29.5, 29.4, 29.2, 26.3, 22.6, 22.3, 14.0, 13.8. Anal. Calcd for C54H74S2O2: C, 79.16; H, 9.10; S, 7.81. Found: C, 79.02; H, 8.21; S, 8.22.

**1,4-Bis[4-(4’-*n*-butylphenyl)-2-thienyl]-2-(2-ethylhexyloxy)-5-methoxybenzene (3b).**

Compound **3b** was prepared according to the procedure described for **3a** utilizing 1,4-dibromo-2-(2-ethylhexyloxy)-5-methoxybenzene (**1b**) (10 mmol), *n*-butyllithium (36 mmol), diisopropylamine (36.4 mmol), zinc chloride (36 mmol), compound **2** (30 mmol) and Pd(PPh3)4 (50 mg), resulting in a yellow solid product. EI-MS (m/e): 664, 552 (100%). 1H NMR (CDCl3, 300 MHz, ppm, ): 7.83 (1H, d, *J* = 1.33 Hz, Th-H), 7.77 (1H, d, *J* = 1.33 Hz, Th-H), 7.56 (4H, d, *J* = 8.04 Hz, Ar-H), 7.41 (2H, d, *J* = 1.00 Hz, Th-H), 7.31 (1H, s, Ar-H), 7.27 (1H, s, Ar-H), 7.23 (4H, d, *J* = 8.04 Hz, Ar-H), 4.02 (2H, d, *J* = 5.52 Hz, OCH2), 3.98 (3H, s, OCH3), 2.64 (4H, t, *J* = 7.68 Hz, CH2), 1.89 (1H, m, CH), 1.66-1.61 (8H, m, CH2), 1.42-1.35 (8H, m, CH2), 0.94 (6H, t, *J* = 7.28 Hz, CH3), 0.88 (6H, t, *J* = 7.02 Hz, CH3). 13C NMR (CDCl3, 75.5 MHz, ppm, ): 149.7, 149.6, 133.8, 128.7, 126.2, 126.1, 124.6, 122.4, 120.2, 120.0, 116.5, 112.3, 112.0, 71.8, 56.5, 39.7, 35.2, 33.5, 30.6, 29.1, 24.0, 23.0, 22.3, 13.7, 12.0, 11.1. Anal. Calcd for C43H52S2O2: C, 77.69; H, 7.88; S, 9.62. Found: C, 77.77; H, 7.44; S, 9.40.

**1,4-Bis[4-(4’-*n*-butylphenyl)-2-thienyl]-2,5-bis(2-ethylhexyloxy)benzene (3c).**

Compound **3c** was prepared according to the procedure described for **3a** utilizing 1,4-dibromo-2,5-bis(2-ethylhexyloxy)benzene (10 mmol), *n*-butyllithium (36 mmol), diisopropylamine (36.4 mmol), zinc chloride (36 mmol), compound **2** (30 mmol) and Pd(PPh3)4 (50 mg), resulting a yellow solid product. EI-MS (m/e): 762, 538 (100%). 1H NMR (CDCl3, 300 MHz, ppm, ): 7.81 (2H, d, *J* = 1.38 Hz, Th-H), 7.57 (4H, d, *J* = 8.07 Hz, Ar-H), 7.41 (2H, d, *J* = 1.20 Hz, Th-H), 7.29 (2H, s, Ar-H), 7.23 (4H, d, *J* = 8.07 Hz, Ar-H), 4.02 (4H, d, *J* = 5.49 Hz, OCH2), 2.64 (4H, t, *J* = 7.68 Hz, CH2), 1.87 (2H, m, CH), 1.69-1.57 (8H, m, CH2), 1.49-1.25 (16H, m, CH2), 0.96 (6H, t, *J* = 7.40 Hz, CH3), 0.95 (6H, t, *J* = 7.29 Hz, CH3), 0.89 (6H, t, *J* = 6.96 Hz, CH3). 13C NMR (CDCl3, 75.5 MHz, ppm, ): 149.5, 141.9, 141.8, 139.8, 133.5, 128.7, 126.1, 124.7, 122.9, 120.0, 112.5, 71.8, 39.7, 35.3, 33.5, 30.7, 29.1, 24.0, 23.0, 22.3, 14.0, 13.8, 11.1. Anal. Calcd for C50H66S2O2: C, 78.71; H, 8.72; S, 8.38. Found: C, 78.88; H, 7.82; S, 8.25.

**Poly[(4-(4’-*n*-butylphenyl)thiophene-2,5-diyl)(2,5-didecyloxy-1,4-phenylene)(4-(4’-*n*-butylphenyl)thiophene-2,5-diyl)] (4a).**

A solution of ferric chloride (4 mmol) in 80 mL of dry chloroform was added dropwise to a stirred solution of monomer **3a** (1 mmol) in 20 mL of dry chloroform at 0 C. After it was stirred for 24 hours at room temperature with a slow dynamic flow of argon, the mixture was poured into stirred methanol (300 mL) to generate the precipitate. The yellow precipitate was collected by filtration and washed thoroughly with methanol and water. The residue was dissolved in THF and dedoped by stirring in 40 mL of concentrated NH3H2O for 12 hours. The yellow solid was isolated by filtration and washed with methanol and water again. After being dried, the solid was washed with acetone for 2 days and then extracted with chloroform in Soxhlet. Removal of chloroform obtained a light yellow solid. (yield, 68%) 1H NMR (CDCl3, 300 MHz, ppm, ): 7.54 (2H, s, Th-H), 7.26 (2H, s, Ar-H), 6.99 (4H, d, *J* = 7.68 Hz, Ar-H), 6.93 (4H, d, *J* = 7.70 Hz, Ar-H), 4.10 (4H, s, OCH2), 2.54 (4H, s, CH2), 1.90 (4H, s, CH2), 1.56 (8H, m, CH2), 1.39-1.24 (28H, m, CH2), 0.97 (6H, t, *J* = 7.25 Hz, CH3), 0.85 (6H, t, *J* = 6.12 Hz, CH3). 13C NMR (CDCl3, 75.5 MHz, ppm, ): 149.3, 140.8, 140.4, 138.6, 133.6, 130.3, 128.0, 127.5, 122.5, 120.8, 111.6, 69.6, 35.2, 33.6, 31.8, 29.6, 29.4, 29.3, 26.3, 22.6, 22.2, 14.0, 13.9. Anal. Calcd for C54H72S2O2: C, 79.36; H, 8.88; S, 7.85. Found: C, 79.18; H, 8.89; S, 7.84.

**Poly[4-(4’-*n*-butylphenyl)thiophene-2,5-diyl)(2-(2-ethylhexyloxy)-5-methoxy-1,4-phenylene)(4-(4’-*n*-butylphenyl)thiophene-2,5-diyl)] (4b).**

Polymer **4b** was prepared according to the procedure described for **4a** utilizing monomer **3b** (0.45 mmol) and ferric chloride (1.8 mmol), resulting a yellow solid product. 1H NMR (CDCl3, 300 MHz, ppm, ): 7.53 (2H, s, Th-H), 7.28 (1H, s, Ar-H), 7.26 (1H, s, Ar-H), 6.97 (4H, d, *J* = 7.69 Hz, Ar-H), 6.90 (4H, d, *J* = 7.70 Hz, Ar-H), 3.96 (5H, m, OCH2, OCH3), 2.53 (4H, s, CH2), 1.87 (1H, m, CH), 1.56 (8H, m, CH2), 1.36 (8H, m, CH2), 0.96 (6H, t, *J* = 7.13 Hz, CH3), 0.87 (6H, m, CH3). 13C NMR (CDCl3, 75.5 MHz, ppm, ): 149.8, 149.7, 140.8, 140.5, 138.4, 134.4, 133.6, 130.1, 128.5, 127.9, 122.5, 111.4, 111.2, 71.8, 56.3, 39.6, 35.2, 33.6, 30.7, 29.1, 24.0, 23.0, 22.2, 14.3, 13.9, 11.2. Anal. Calcd for C43H50S2O2: C, 77.92; H, 7.60; S, 9.65. Found: C, 77.15; H, 7.90; S, 8.66.

**Poly[4-(4’-*n*-butylphenyl)thiophene-2,5-diyl)(2,5-bis(2-ethylhexyloxy)-1,4-phenylene)(4-(4’-*n*-butylphenyl)thiophene-2,5-diyl) (4c).**

Polymer **4c** was prepared according to the procedure described for **4a** utilizing monomer **3c** (1 mmol) and ferric chloride (4 mmol), resulting a yellow solid product. 1H NMR (CDCl3, 300 MHz, ppm, ): 7.54 (2H, s, Th-H), 7.27 (2H, s, Ar-H), 6.97 (4H, d, *J* = 7.80 Hz, Ar-H), 6.89 (4H, d, *J* = 7.81 Hz, Ar-H), 4.00 (4H, s, OCH2), 2.53 (4H, s, CH2), 1.86 (2H, m, CH), 1.56 (8H, m, CH2), 1.33 (16H, m, CH2), 0.96 (12H, m, CH3), 0.87 (6H, m, CH3). 13C NMR (CDCl3, 75.5 MHz, ppm, ): 149.4, 140.7, 140.5, 138.7, 133.6, 130.0, 127.9, 127.8, 122.4, 116.9, 111.6, 71.7, 38.8, 35.4, 33.6, 30.9, 29.1, 24.0, 23.0, 22.2, 14.0, 13.9, 11.1. Anal. Calcd for C50H64S2O2: C, 78.92; H, 8.48; S, 8.40. Found: C, 78.28; H, 8.46; S, 7.92.
